# Supplementary material for: Natural variation of physiological traits, molecular markers, and chlorophyll catabolic genes associated with heat tolerance in perennial ryegrass accessions
Source: BMC Plant Biol. 2020 Nov 16;20:520. doi: 10.1186/s12870-020-02695-8 (PMC7667755; doi:10.1186/s12870-020-02695-8)
Supplement: Supplementary file 4 — Additional file 4: Supplementary materials 3. Linkage group, physical distance, and primer sequences of 66 SSRs used in this study. [file 12870_2020_2695_MOESM4_ESM.xlsx]

## Sheet: Sheet1
Marker	Major.Allele.Frequency	Genotype No.	SampleSize	No. of obs.	Allele No	Availability	GeneDiversity	Heterozygosity	PIC
SSR1	0.168367	63	98	98	26	1	0.927166	0.836735	0.922908
SSR18	0.520408	27	98	98	20	1	0.695439	0.877551	0.676599
SSR19	0.760204	8	98	98	8	1	0.392649	0.479592	0.358558
SSR20	0.27551	27	98	98	19	1	0.834236	0.622449	0.815223
SSR21	0.290816	26	98	98	12	1	0.814244	0.27551	0.79107
SSR22	0.913265	3	98	98	3	1	0.162068	0.0714286	0.155591
SSR24	0.295918	25	98	98	13	1	0.813151	0.397959	0.789645
SSR25	0.367347	13	98	98	8	1	0.747137	0.438776	0.708648
SSR27	0.484694	31	98	98	17	1	0.740056	0.5	0.727773
SSR28	0.173469	36	98	98	22	1	0.908944	0.22449	0.902146
SSR30	0.244898	53	98	98	21	1	0.870523	0.693878	0.85921
SSR31	0.377551	31	98	98	22	1	0.79191	0.346939	0.771118
SSR32	0.494898	21	98	98	15	1	0.641868	0.418367	0.585695
SSR33	0.535714	13	98	98	7	1	0.614275	0.55102	0.556102
SSR34	0.637755	8	98	98	5	1	0.525458	0.55102	0.468891
SSR36	0.306122	14	98	98	8	1	0.72803	0.857143	0.677699
SSR38	0.704082	12	98	98	9	1	0.469284	0.367347	0.434393
SSR39	0.688776	9	98	98	6	1	0.477301	0.408163	0.431083
SSR40	0.515306	13	98	98	9	1	0.681851	0.244898	0.652034
SSR41	0.295918	32	98	98	16	1	0.824708	0.642857	0.8047
SSR42	0.209184	31	98	98	13	1	0.860527	0.663265	0.845081
SSR43	0.566327	14	98	98	8	1	0.633486	0.285714	0.602822
SSR44	0.678571	4	98	98	3	1	0.439452	0.367347	0.347274
SSR45	0.739796	11	98	98	5	1	0.423469	0.326531	0.391141
SSR46	0.739796	11	98	98	9	1	0.432164	0.387755	0.409536
SSR47	0.209184	19	98	98	10	1	0.865317	0.663265	0.850714
SSR48	0.877551	4	98	98	3	1	0.217201	0.0612245	0.197633
SSR49	0.561224	13	98	98	9	1	0.633434	0.408163	0.599151
SSR51	0.377551	23	98	98	12	1	0.754009	0.438776	0.720666
SSR52	0.632653	9	98	98	9	1	0.516399	0.204082	0.449395
SSR53	0.464286	7	98	98	5	1	0.594648	0.459184	0.509071
SSR55	0.44898	14	98	98	7	1	0.725895	0.214286	0.693353
SSR56	0.556122	25	98	98	13	1	0.66691	0.540816	0.651704
SSR57	0.408163	20	98	98	12	1	0.747865	0.306122	0.715939
SSR58	0.290816	36	98	98	20	1	0.833663	0.326531	0.816617
SSR59	0.362245	24	98	98	11	1	0.804717	0.469388	0.784701
SSR63	0.265306	32	98	98	19	1	0.852822	0.336735	0.838639
SSR67	0.602041	20	98	98	9	1	0.600791	0.326531	0.573268
SSR71	0.255102	27	98	98	15	1	0.871824	0.326531	0.860478
SSR72	0.316327	31	98	98	17	1	0.825333	0.836735	0.807332
SSR73	0.372449	32	98	98	16	1	0.81237	0.816327	0.796897
SSR75	0.173469	54	98	98	25	1	0.916129	0.489796	0.910623
SSR76	0.285714	18	98	98	11	1	0.821585	0.397959	0.798961
SSR77	0.295918	19	98	98	9	1	0.832153	0.132653	0.813046
SSR78	0.357143	26	98	98	15	1	0.78889	0.561224	0.763361
SSR79	0.443878	15	98	98	10	1	0.727197	0.408163	0.693682
SSR80	0.403061	29	98	98	17	1	0.772907	0.255102	0.749918
SSR82	0.188776	38	98	98	22	1	0.88838	0.306122	0.878576
SSR83	0.484694	24	98	98	17	1	0.721002	0.204082	0.699294
SSR85	0.704082	7	98	98	5	1	0.464754	0.0204082	0.425291
SSR87	0.295918	28	98	98	19	1	0.850843	0.132653	0.83738
SSR88	0.408163	22	98	98	13	1	0.759423	0.265306	0.731717
SSR90	0.173469	43	98	98	18	1	0.903061	0.469388	0.895257
SSR91	0.418367	32	98	98	16	1	0.768326	0.27551	0.746784
SSR92	0.158163	54	98	98	25	1	0.925812	0.489796	0.921236
SSR93	0.153061	47	98	98	15	1	0.89671	0.602041	0.887712
SSR95	0.382653	28	98	98	10	1	0.775094	0.530612	0.748141
SSR96	0.112245	56	98	98	22	1	0.935704	0.622449	0.93203
SSR97	0.408163	16	98	98	10	1	0.717514	0.367347	0.675564
SSR98	0.47449	15	98	98	8	1	0.678571	0.397959	0.631977
SSR99	0.586735	13	98	98	9	1	0.583559	0.265306	0.532627
SSR101	0.433673	26	98	98	14	1	0.765462	0.632653	0.746423
SSR102	0.397959	15	98	98	6	1	0.755258	0.408163	0.722824
SSR110	0.147959	42	98	98	18	1	0.914671	0.367347	0.908466
SSR114	0.352041	32	98	98	17	1	0.798521	0.510204	0.775605
SSR115	0.153061	57	98	98	22	1	0.919929	0.602041	0.914546
Mean	0.414811	24.6667	98	98	13.0909	1	0.722031	0.428571	0.695326
					864
